# Supplementary material
Source: Springer Nature journal article supplement (https://www.springermedizin.de/resource/supplementary/12885_2012_3384_MOESM2_ESM.pdf/9463626)

CD11a

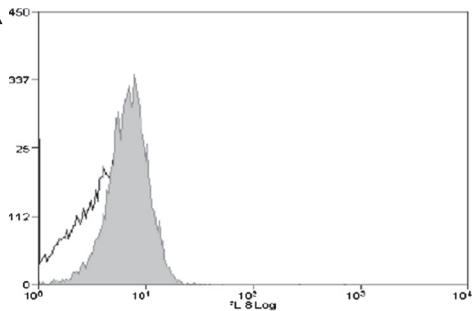

CD18

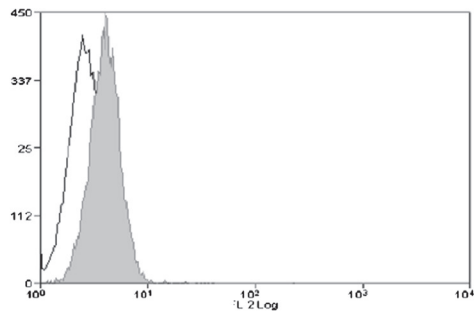

A375

Cell number

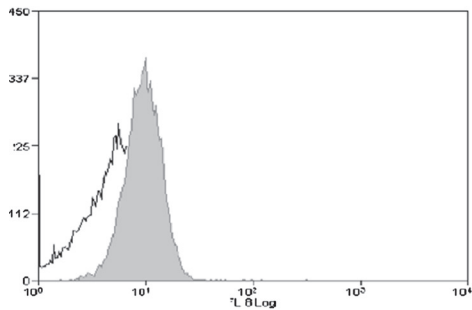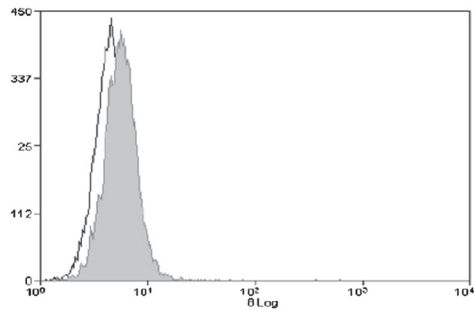

1205LU

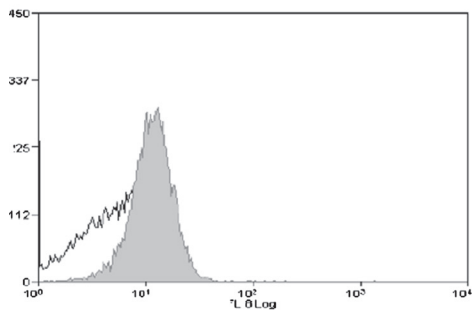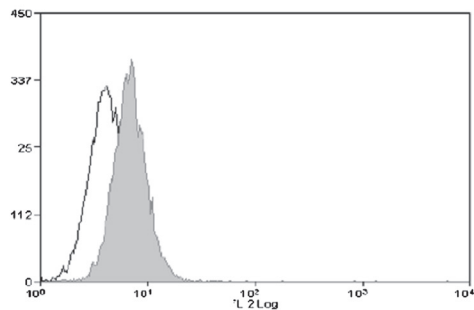

SLM8

Intensity of fluorescence

Supplement: MOESM2 [file 9463626]
